# Supplementary material for: Association of Immune-Mediated Cerebellitis With Immune Checkpoint Inhibitor Therapy
Source: PubMed Central journal article supplement — Mayo Clin Proc Innov Qual Outcomes. 2018 Feb 1;2(1):74–7. doi: 10.1016/j.mayocpiqo.2017.12.001 (PMC6124334; doi:10.1016/j.mayocpiqo.2017.12.001), 2018-02-01
Supplement: mmc1.pdf [file mmc1.pdf]

Supplementary Table 1: Cases of immune checkpoint inhibitor related encephalitis and encephalopathy<sup>4,9-15</sup>

| Case            | Age (yrs)/ Sex | Cancer type                          | ICI therapy                                                                           | Signs and symptoms                                                                                                                           | Time from start of ICI to symptoms | MRI Brain Findings                                 | Basic CSF studies                                                                 | Other relevant studies                                                                                                                      | Immunosuppressive therapy                                                                                     | Symptoms resolved?<br>Time from steroids to symptom resolution | Tumor status        |
|-----------------|----------------|--------------------------------------|---------------------------------------------------------------------------------------|----------------------------------------------------------------------------------------------------------------------------------------------|------------------------------------|----------------------------------------------------|-----------------------------------------------------------------------------------|---------------------------------------------------------------------------------------------------------------------------------------------|---------------------------------------------------------------------------------------------------------------|----------------------------------------------------------------|---------------------|
| 1 <sup>9</sup>  | 60's / M       | Metastatic small cell lung cancer    | Nivolumab 1 mg/kg, Ipilimumab 3 mg/kg concomitantly (1 dose)                          | difficulty ambulating, dizziness, disorientation, memory loss, paresthesias, lethargy, poor recall, intention tremor, hyper-reflexia, ataxia | 4 days                             | T2 hyper-intensities in right mesial temporal lobe | WBC 18/μL (89% lymphocytes, 11% monocytes), protein 98 mg/dL, normal glucose      | Positive serum anti-glial nuclear antibody<br><br>Matched oligoclonal bands in CSF and serum, normal IgG index                              | Oral prednisone 60 mg/d discharged with slow taper                                                            | Yes,<br>4 weeks                                                | PR                  |
| 2 <sup>10</sup> | 78 / M         | Squamous cell lung cancer            | Nivolumab 3 mg/kg q2 weeks                                                            | apathy, aphasia, absent verbal response, positive Babinski, bilateral upper extremity myoclonus                                              | 28 weeks                           | No acute findings                                  | WBC 16 lymphocytes/μL, protein 103 mg/dL, low glucose                             | Negative paraneoplastic and autoimmune antibody testing<br><br>Negative blood and CSF cultures                                              | 1.33 mg/kg methylprednisolone with 9 week taper                                                               | Yes,<br>24 hours                                               | PR                  |
| 3 <sup>15</sup> | 66 / M         | Metastatic NSCLC                     | Pembrolizumab 200 mg q3 weeks x 2 cycles                                              | somnolence, confusion, ataxia, expressive dysphasia, cognitive impairment                                                                    | 3.5 weeks                          | No acute findings                                  | Normal cell count, normal protein, normal glucose                                 | Negative vasculitis screen, acetylcholine receptor antibodies, paraneoplastic and anti-VGKC antibodies                                      | Methylprednisolone IV 1gm/d x 3 d, then 60 mg prednisolone daily weaned by 10 mg weekly                       | Yes,<br>3 days                                                 | PR                  |
| 4 <sup>13</sup> | 64 / M         | Castration resistant prostate cancer | Ipilimumab 10 mg/kg q3 weeks x 4 cycles, then Ipilimumab q3 months x 3 doses          | adynamia, memory disturbance, disorientation, somnolence, agitation, hallucinations, positive Babinski, myoclonic and focal seizures         | 11 months                          | No acute findings                                  | Normal cell count, protein 76 mg/L, normal glucose                                | Negative CSF and serum anti-NMDA, VGKC and onconeural antibodies<br><br>Negative vasculitis antibodies<br><br>Elevated anti-TPO and anti-TG | Methylprednisolone IV 1 gm/d x 3 d, then prednisone 100 mg oral, tapered to 60 mg/d, followed by 4 week taper | Yes,<br>2 weeks                                                | CR                  |
| 5 <sup>4</sup>  | 61 / M         | Advanced melanoma                    | Nivolumab 1 mg/kg IV + Ipilimumab 3 mg/kg (4 doses) then Nivolumab 3 mg/kg (one dose) | progressive altered mental status, unresponsiveness, seizures                                                                                | 18 weeks                           | Abnormally high FLAIR signal                       | WBC 14/μL (32% neutrophils, 25% lymphocytes), protein 85 mg/dL, glucose 212 mg/dL | Negative CSF infectious studies                                                                                                             | Methylprednisolone 125 mg IV BID x 5 d, then prednisone 75 mg/d and IVIG 1g/kg                                | Yes,<br>7 days                                                 | Progressive disease |
| 6 <sup>4</sup>  | 83 / F         | Advanced melanoma                    | Nivolumab 3 mg/kg q2 weeks x 4 cycles                                                 | sudden change in mental status, seizure, lower extremity weakness, hyporeflexia, comatose state                                              | 7 weeks                            | No acute findings                                  | WBC normal, protein 103 mg/dL, glucose normal                                     | Negative CSF bacterial and fungal staining                                                                                                  | Continued on home maintenance oral steroids of prednisone 30 mg daily                                         | No,<br>Died 9 days after presentation                          | Not assessed        |

| Case             | Age (yrs)/ Sex | Cancer type       | ICI therapy                                                                                                                          | Signs and symptoms                                                                                                   | Time from start of ICI to symptoms | MRI Brain Findings                                                    | Basic CSF studies                                                    | Other relevant studies                                                                                                                 | Immunosuppressive therapy                                                                                                                                                               | Symptoms resolved?<br>Time from steroids to symptom resolution | Tumor status        |
|------------------|----------------|-------------------|--------------------------------------------------------------------------------------------------------------------------------------|----------------------------------------------------------------------------------------------------------------------|------------------------------------|-----------------------------------------------------------------------|----------------------------------------------------------------------|----------------------------------------------------------------------------------------------------------------------------------------|-----------------------------------------------------------------------------------------------------------------------------------------------------------------------------------------|----------------------------------------------------------------|---------------------|
| 7 <sup>4</sup>   | 57 / M         | Advanced melanoma | Nivolumab 3 mg/kg IV q2 weeks x 6 cycles, then Ipilimumab 3 mg/kg IV q3 weeks x 4 cycles, then Nivolumab 3 mg/kg q2 weeks x 8 cycles | headache, confusion, inattention, inability to follow complex commands                                               | 10 months                          | No acute findings                                                     | WBC 52/μL (lymphocyte predominance)                                  | Negative CSF infectious studies                                                                                                        | Methylprednisolone IV followed by prednisone taper over 48 days                                                                                                                         | Yes, 6 days                                                    | Near CR             |
| 8 <sup>4</sup>   | 58 / F         | Advanced melanoma | Ipilimumab x 4 cycles, then 5 months later Nivolumab 3 mg/kg q2 weeks                                                                | progressive confusion, aphasia, disorientation                                                                       | 3 weeks                            | No acute findings                                                     | WBC 18/μL (92% lymphocytes)                                          | Negative paraneoplastic and autoimmune antibody testing<br>Negative CSF infectious studies                                             | Methylprednisolone 100 mg IV (1-2 mg/kg) x 6 days (no improvement), dexamethasone 200 mg/d plus 5 d of IVIG 400 mg/kg/d, followed by steroid taper                                      | Yes, 21 days                                                   | Progressive disease |
| 9 <sup>4</sup>   | 53 / F         | Advanced melanoma | Nivolumab 1 mg/kg plus Ipilimumab 3 mg/kg q3 weeks x 2 cycles                                                                        | slurred speech, aphasia, agitation, inability to ambulate, dizziness                                                 | 7 weeks                            | No acute findings                                                     | Lymphocytosis (86% lymphocytes), protein 312 mg/dL, glucose 43 mg/dL | Extensive negative infectious work up<br>Negative CSF cultures and serologies                                                          | Dexamethasone IV 10 mg q6 hours                                                                                                                                                         | Yes, 5 days                                                    | Progressive disease |
| 10 <sup>9</sup>  | 50's / F       | Advanced melanoma | Nivolumab 1 mg/kg, IPI 3 mg/kg concomitantly (1 dose)                                                                                | syncope, memory loss, unresponsiveness, gait disturbance, dysautonomia, disorientation, bradykinesia, hyper-reflexia | 2 weeks                            | No acute findings                                                     | WBC 8/μL (100% lymphocytes), normal protein, normal glucose          | Positive CSF IgG NMDAR antibodies<br>Negative CSF HSV PCR and cytology<br>Matched oligoclonal bands in CSF and serum, normal IgG index | Methylprednisolone IV 1gm/d x 5 d then IVIG 0.4 mg/kg/d x 5 d (no improvement); rituximab 1 gm x 2 doses                                                                                | Yes, 4 weeks of gradual improvement after starting rituximab   | PR                  |
| 11 <sup>11</sup> | 41 / M         | Advanced melanoma | Ipilimumab 10 mg/kg q3 weeks x 3 cycles                                                                                              | expressive aphasia, decreased motor dexterity, gait ataxia                                                           | 8.5 weeks                          | T2 FLAIR hyper-intensity & restricted diffusion of posterior splenium | WBC 125/μL (lymphocyte predominance), minimally elevated protein     | Negative anti-DNA, ANA, RF<br>CSF absent oligoclonal bands<br>Negative CSF cytology                                                    | Prednisone 30 mg/d x 3 d (no response), increased to 1 mg/kg; methylprednisolone 2mg/kg IV x 5 d after peripheral neuropathy and neurogenic bladder developed; prednisone 1 mg/kg taper | Yes, 8 weeks                                                   | Near PR             |

| Case             | Age (yrs)/ Sex | Cancer type                           | ICI therapy                                                        | Signs and symptoms                                                                                                                           | Time from start of ICI to symptoms         | MRI Brain Findings                                                   | Basic CSF studies                                                               | Other relevant studies                                                                                                             | Immunosuppressive therapy                                                                                                                                         | Symptoms resolved?<br>Time from steroids to symptom resolution | Tumor status |
|------------------|----------------|---------------------------------------|--------------------------------------------------------------------|----------------------------------------------------------------------------------------------------------------------------------------------|--------------------------------------------|----------------------------------------------------------------------|---------------------------------------------------------------------------------|------------------------------------------------------------------------------------------------------------------------------------|-------------------------------------------------------------------------------------------------------------------------------------------------------------------|----------------------------------------------------------------|--------------|
| 12 <sup>12</sup> | 71 / M         | Advanced melanoma                     | Ipilimumab 3 mg/kg q3 weeks x 2 cycles                             | fatigue, headache, confusion, myoclonic jerks, slow mentation, aphasia, intention tremor, postural tremor, lower extremity dysmetria, ataxia | 11 weeks                                   | No acute findings                                                    | Normal cell count, protein 137 mg/dL                                            | Negative anti-NMDA<br><br>Low cortisol, TSH, FT4, testosterone, LH<br><br>Negative CSF cultures, viral and bacterial PCRs negative | (Hydrocortisone 50 mg/d at home for prior diagnosis of hypophysitis), switched to methylprednisolone IV 1 gm/d x 3 d, followed by 4 week methylprednisolone taper | Yes ,<br>24 hours                                              | Not reported |
| 13 <sup>14</sup> | 64 / M         | Advanced melanoma                     | Pembrolizumab x 12 months, skipped 1 month, then resumed x 1 month | slowly progressive memory decline, obsessive over certain tasks                                                                              | Gradual decline since treatment initiation | Bilateral T2 signal change of limbic structures; hippocampal atrophy | Lymphocytosis, elevated protein                                                 | Negative paraneoplastic panel, CSF viral PCRs, bacterial cultures<br><br>Normal vitamin B12, folate, HIV, syphilis screen          | Methylprednisolone IV followed by oral prednisolone taper                                                                                                         | No, but steroids helped prevent further decline                | Not reported |
| Our case         | 20 / M         | Primary refractory Hodgkin's lymphoma | Nivolumab 3 mg/kg q2 weeks x 3 cycles                              | bilateral headache, diplopia, nausea, vomiting, ataxia, dysmetria                                                                            | 6 weeks                                    | T2 hyper-intensities in cerebellum, cerebellar edema                 | WBC 31/μL (94% lymphocytes, 6% monocytes), protein 161 mg/dL, glucose 73 mg/dL. | Negative CSF cultures and gram stain, HSV PCR, Cryptococcal antigen                                                                | Dexamethasone IV 8 mg q6 hours x 6 d followed by 4 week taper                                                                                                     | Yes,<br>6 days                                                 | PR           |

#### Abbreviations

CR: Complete remission  
CSF: cerebrospinal fluid  
d: day(s)  
dL: deciliters  
EEG: electroencephalogram  
F: female  
FLAIR: fluid-attenuated inversion recovery  
FT4: free thyroxine  
HIV: human immunodeficiency virus  
HSV: herpes simplex virus  
ICI: immune checkpoint inhibitor  
IV: intravenous  
LH: luteinizing hormone  
M: male  
mg: milligrams  
MRI: magnetic resonance imaging  
NMDA: N-methyl-D-aspartate  
NMDAR: N-methyl-D-aspartate receptor  
NSCLC: non-small cell lung cancer  
PCR: polymerase chain reaction  
PR: Partial response  
q: every  
TG: thyroglobulin  
TPO: thyroid peroxidase

TSH: thyroid stimulating hormone  
VGKC: voltage gated potassium channel  
WBC: white blood cell  
yrs: years  
 $\mu\text{L}$ : microliters
